# Supplementary material for: Ancient DNA from the extinct New Zealand grayling (Prototroctes oxyrhynchus) reveals evidence for Miocene marine dispersal
Source: bioRxiv or medRxiv preprint supplement (doi:10.1101/2022.05.12.491729), 2022-05-13
Supplement: Supplementary file [file media-1.pdf]

## Supplementary Material for:

### **Ancient DNA from the extinct New Zealand grayling (*Prototroctes oxyrhynchus*) reveals evidence for Miocene marine dispersal**

Lachie Scarsbrook<sup>1,\*</sup>, Kieren J. Mitchell<sup>1</sup>, Matthew D. McGee<sup>2</sup>, Gerard P. Closs<sup>3</sup>,  
Nicolas J. Rawlence<sup>1,\*</sup>

<sup>1</sup>Otago Palaeogenetics Laboratory, Department of Zoology, University of Otago, Dunedin, New Zealand.

<sup>2</sup>Behavioral Studies Group, School of Biological Sciences, Monash University, Melbourne, Victoria, Australia.

<sup>3</sup>Department of Zoology, University of Otago, Dunedin, New Zealand.

Prepared for submission to *Freshwater Biology*

\*Corresponding author emails: [lachiecarsbrook@gmail.com](mailto:lachiecarsbrook@gmail.com);  
[nic.rawlence@otago.ac.nz](mailto:nic.rawlence@otago.ac.nz)

### Table of Contents:

|                                      |        |
|--------------------------------------|--------|
| <b>Supplementary Figures (S1-S2)</b> | Page 2 |
| <b>Supplementary Tables (S1-S3)</b>  | Page 4 |

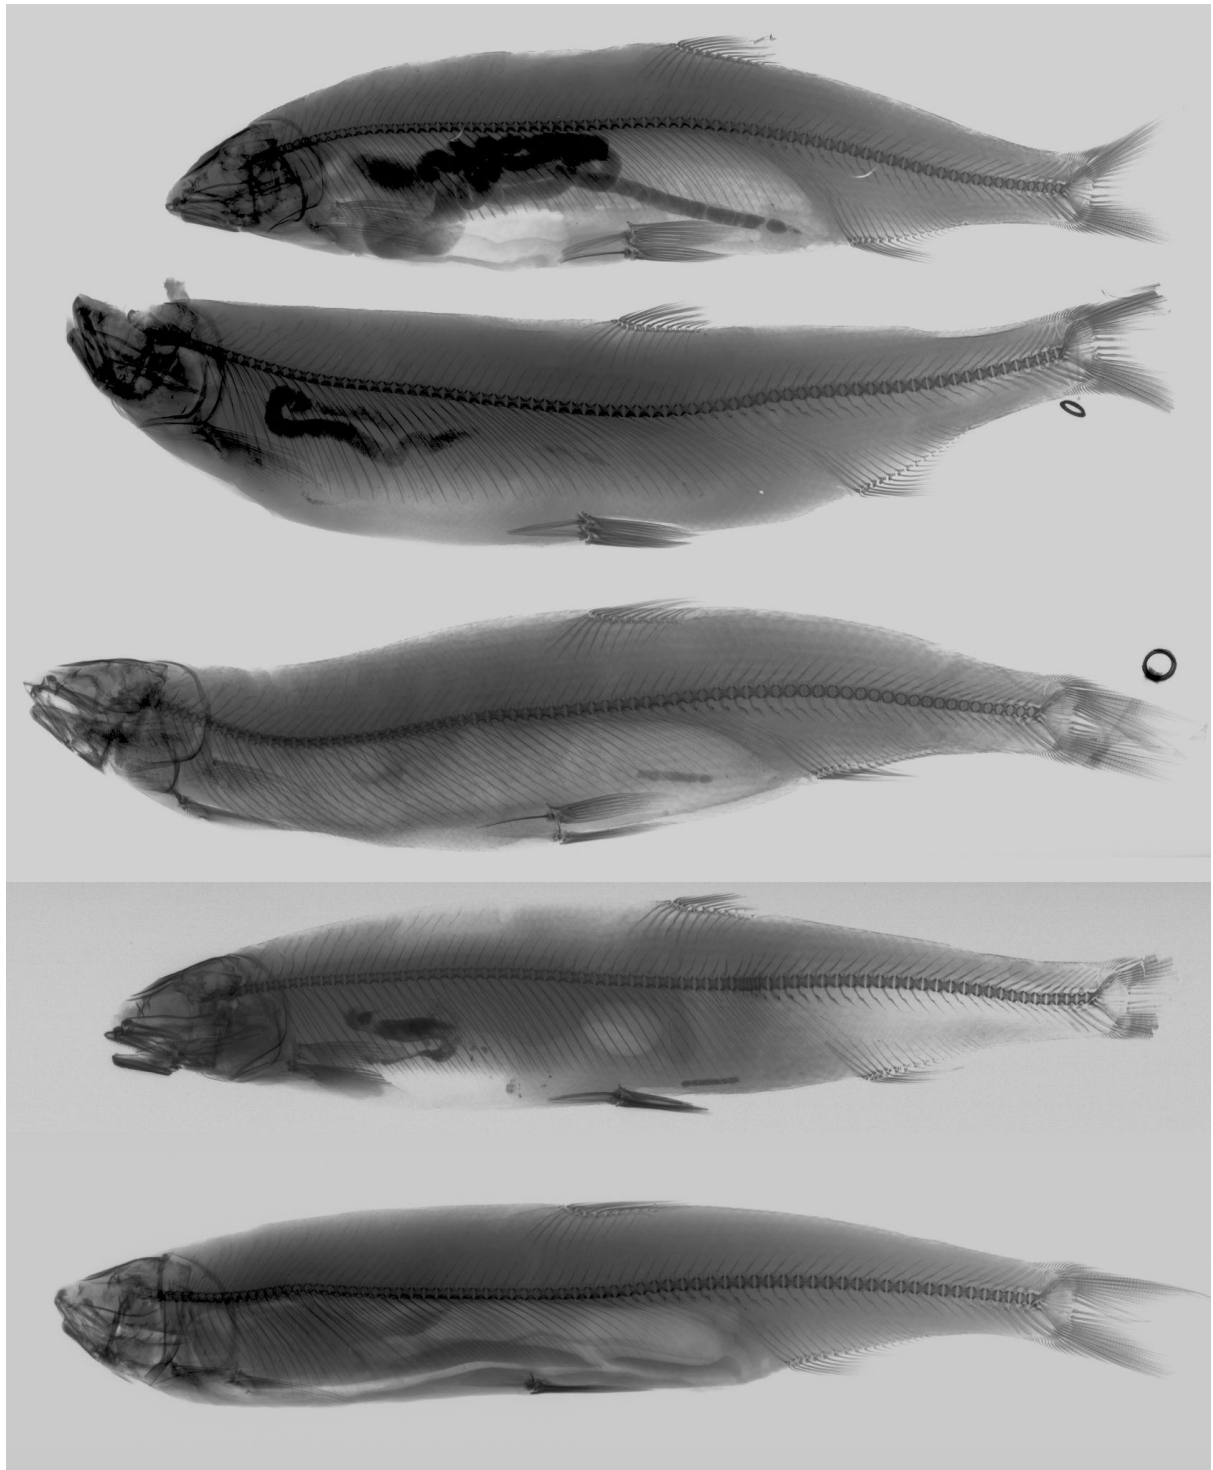

**Supplementary Figure 1** X-ray images of New Zealand grayling (*Prototroctes oxyrhynchus*) specimens at the British National History Museum (NMUK), used to assess preservation of calcareous otoliths. Images were generated by James Maclaine (NMUK). Top to bottom: 1870.5.22.17 (syntype); 1870.5.22.18 (syntype); 1873.12.13.69; 1886.11.18.80; 1935.3.14.65.

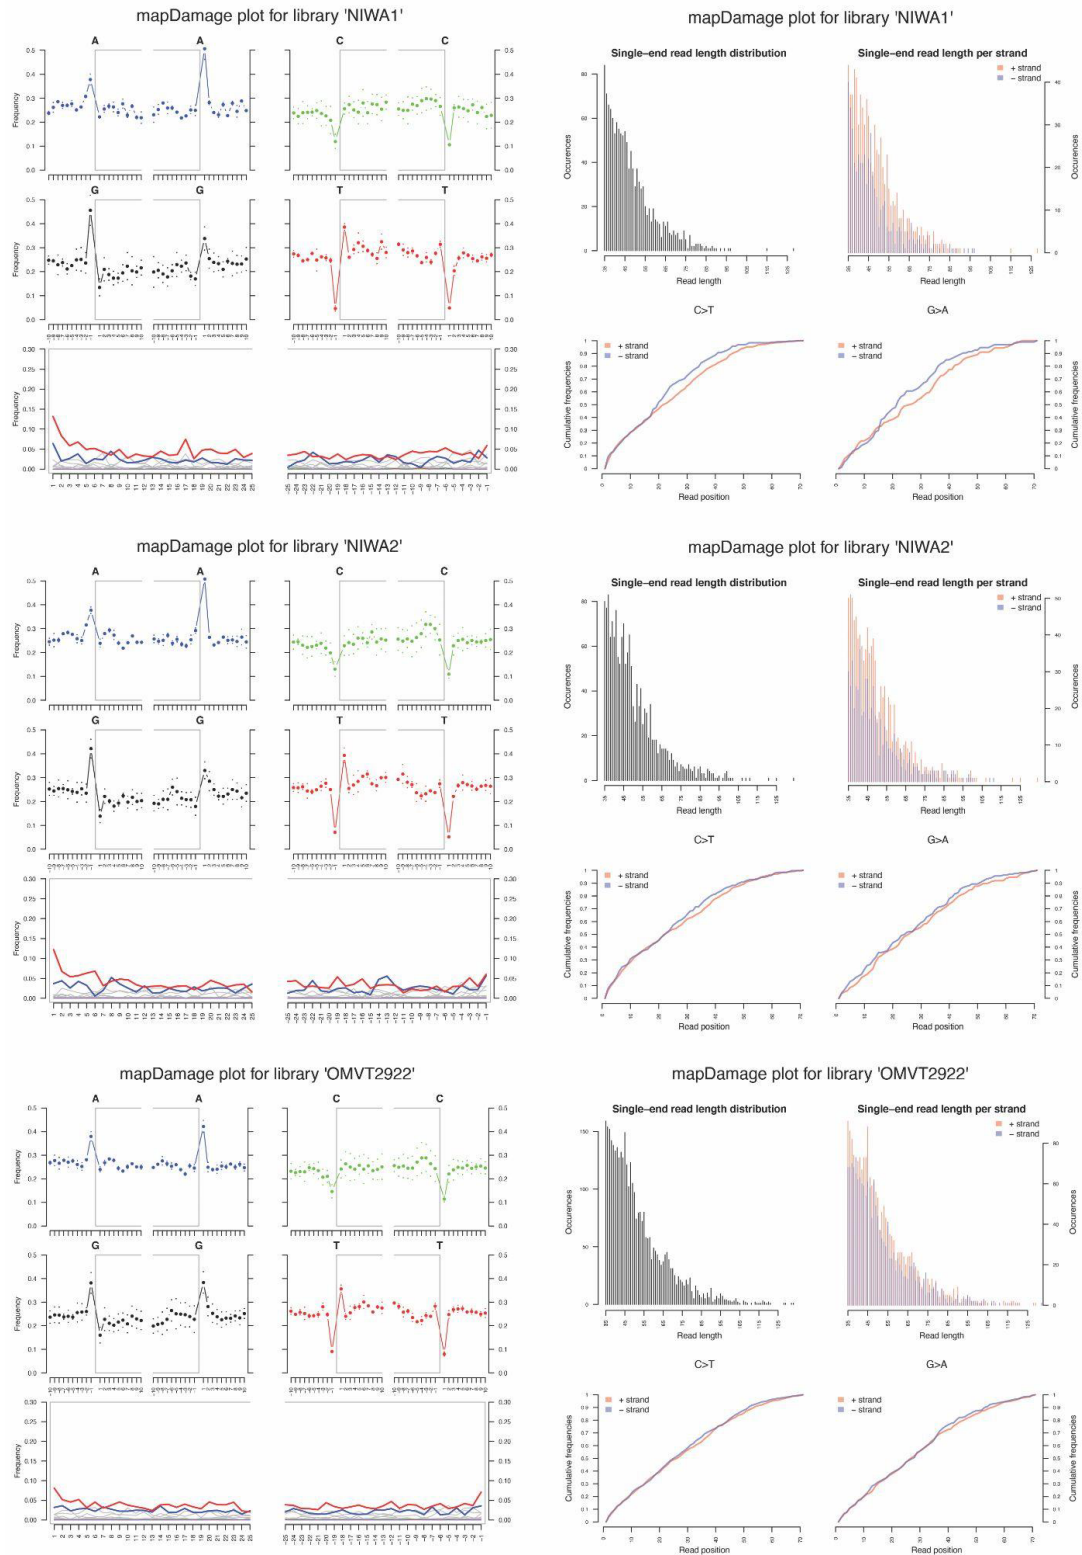

**Supplementary Figure 2** MapDamage reports for mapped collapsed reads of historic New Zealand grayling (*Prototroctes oxyrhynchus*) single-stranded libraries (NIWA1, NIWA2, OMVT2922). The left panels show characteristic high frequency of purines (A and G) at read termini (top) and accumulation of 5' C to T (red curve) misincorporations (bottom), which authenticate ancient DNA. The right panel shows characteristic short fragment length of single-end mapped reads (top).

**Supplementary Table 1** Sample information for New Zealand grayling (*Prototroctes oxyrhynchus*) specimens including: institution (Auckland War Memorial Museum (AWMM), Canterbury Museum (CM), Museum of New Zealand Te Papa Tongarewa (NMNZ), Otago Museum (OM) and unregistered (unreg.), sample identification (ID), tissue type and locality.

| Institution | Sample ID | Tissue Type     | Locality                      |
|-------------|-----------|-----------------|-------------------------------|
| AWMM        | MA110     | muscle ('wet')  | New Zealand                   |
| AWMM        | MA189     | muscle ('wet')  | New Zealand                   |
| AWMM        | MA190     | muscle ('wet')  | New Zealand                   |
| AWMM        | NGD01     | scale ('dried') | New Zealand                   |
| CM          | CM1631    | muscle ('wet')  | Westland                      |
| CM          | CM1632    | muscle ('wet')  | Waiau River, Southland        |
| CM          | CM1633    | muscle ('wet')  | Orari River, Canterbury       |
| NMNZ        | NMNZ130   | scale ('dried') | Waimakariri River, Canterbury |
| NMNZ        | NMNZP339  | muscle ('wet')  | Turanganui River, Gisborne    |
| OM          | OMVT2922  | scale ('dried') | Clutha River, Otago           |
| NIWA        | NIWA1     | scale ('dried') | Hokitika River, Westland      |
| NIWA        | NIWA2     | scale ('dried') | Hokitika River, Westland      |

**Supplementary Table 2** GenBank Accession numbers for Retropinnidae (R) and Osmeridae (O) sequences used in phylogenetic analyses. \* denotes sequences derived through annotation extraction from complete mitochondrial genomes. Bolded accession numbers indicate sequences generated in this study.

| Species                             | Mitogenome               | Cytochrome B                                                                                                          | 16S rRNA                                                     |
|-------------------------------------|--------------------------|-----------------------------------------------------------------------------------------------------------------------|--------------------------------------------------------------|
| <i>Prototroctes maraena</i> (R)     | <b>ON220597</b>          | <b>ON161129–ON161135</b>                                                                                              | AF454844.1, HM151552.1                                       |
| <i>Prototroctes oxyrhynchus</i> (R) | <b>ON220594–ON220596</b> | -                                                                                                                     | -                                                            |
| <i>Retropinna retropinna</i> (R)    | NC.004598.1              | *AP004108.1, *NC004598.1, FJ392549.1, FJ392550.1                                                                      | *AP004108.1, *NC004598.1, AF454842.1, FJ392551.1, FJ392552.1 |
| <i>Retropinna semoni</i> (R)        | KX421784.1, KX421785.1   | *KX421784.1, *KX421785.1, NC031372.1, HM007065.1–HM007067.1, JN232588.1, JX914039.1–JX914083.1, MG867590.1–MG867657.1 | *KX421784.1, *KX421785.1, *NC031372.1, AF454845.1            |
| <i>Retropinna tasmanica</i> (R)     | -                        | AF112321.1, JN232589.1                                                                                                | AF112342.1                                                   |
| <i>Stokellia anisodon</i> (R)       | -                        | JN232590.1                                                                                                            | AF454843.1, HM151553.1                                       |
| <i>Hypomesus japonicus</i> (O)      | MH636616.1               | -                                                                                                                     | -                                                            |
| <i>Hypomesus nipponensis</i> (O)    | HM106489.1               | -                                                                                                                     | -                                                            |
| <i>Hypomesus olidus</i> (O)         | KP281293.1               | -                                                                                                                     | -                                                            |
| <i>Mallotus villosus</i> (O)        | HM106491.1               | -                                                                                                                     | -                                                            |
| <i>Osmerus eperlanus</i> (O)        | NC.052758.1              | -                                                                                                                     | -                                                            |
| <i>Osmerus mordax</i> (O)           | HM106493.1               | -                                                                                                                     | -                                                            |
| <i>Plecoglossus altivelis</i> (O)   | AB047553.2               | -                                                                                                                     | -                                                            |
| <i>Salangichthys microdon</i> (O)   | NC.004599.1              | -                                                                                                                     | -                                                            |
| <i>Salanx ariakensis</i> (O)        | AP006231.1, KM517200.1   | -                                                                                                                     | -                                                            |
| <i>Salanx chinensis</i> (O)         | MW131880.1               | -                                                                                                                     | -                                                            |
| <i>Salanx cuvieri</i> (O)           | KJ645978.1               | -                                                                                                                     | -                                                            |

**Supplementary Table 3** Mitochondrial genome assembly statistics for historic New Zealand grayling (*Prototroctes oxyrhynchus*) specimens (see Supplementary Table 1) with reads generated through single-stranded library preparation. Summary statistics are not reported (denoted by “-”) for “GC content (%)”, “Ambiguous Sites”, “Ambiguous bases (%)”, “Reference sequence coverage (%)” and “Contig length (bp)” in the majority of individuals given insufficient reference sequence coverage.

| Sample   | Paired-end reads | Collapsed reads | Mapped reads (raw) | Mapped reads (excl. duplicates) | Endogenous DNA (%) | Mean fragment length (bp) | GC content (%) | Mean coverage $\pm$ SD | Ambiguous Sites | Ambiguous bases (%) | Reference sequence coverage (%) | Contig length (bp) |
|----------|------------------|-----------------|--------------------|---------------------------------|--------------------|---------------------------|----------------|------------------------|-----------------|---------------------|---------------------------------|--------------------|
| NGD01    | 4,671,869        | 2,020,413       | 58                 | 58                              | 0.00%              | 43.7                      | -              | 0.15                   | -               | -                   | -                               | -                  |
| NIWA1    | 5,080,301        | 1,686,400       | 1,310              | 1,262                           | 0.10%              | 47.7                      | 47.70%         | 3.63                   | 6,418           | 38.68%              | 79.80%                          | 16,593             |
| NIWA2    | 5,412,541        | 2,046,902       | 1,652              | 1,582                           | 0.10%              | 49.7                      | 47.60%         | 4.74                   | 4,636           | 27.94%              | 86.60%                          | 16,593             |
| NMNZ130  | 4,584,116        | 1,935,302       | 125                | 115                             | 0.00%              | 43.5                      | -              | 0.3                    | -               | -                   | -                               | -                  |
| OMVT2922 | 5,514,150        | 2,015,039       | 3,659              | 3,501                           | 0.20%              | 51.4                      | 48.10%         | 10.84                  | 711             | 4.29%               | 96.20%                          | 16,592             |
| CM1631   | 6,545,738        | 2,110,943       | 11                 | 1                               | 0.00%              | 38                        | -              | 0                      | -               | -                   | -                               | -                  |
| CM1632   | 8,947,473        | 3,908,601       | 0                  | 0                               | 0.00%              | 0                         | -              | 0                      | -               | -                   | -                               | -                  |
| CM1633   | 7,885,774        | 3,263,917       | 0                  | 0                               | 0.00%              | 0                         | -              | 0                      | -               | -                   | -                               | -                  |
| MA110    | 5,808,531        | 1,841,448       | 10                 | 7                               | 0.00%              | 49.9                      | -              | 0.02                   | -               | -                   | -                               | -                  |
| MA189    | 6,157,394        | 2,588,468       | 0                  | 0                               | 0.00%              | 0                         | -              | 0                      | -               | -                   | -                               | -                  |
| MA190    | 4,805,344        | 1,843,397       | 24                 | 2                               | 0.00%              | 57.5                      | -              | 0.01                   | -               | -                   | -                               | -                  |
| NMNZP339 | 4,798,497        | 1,642,070       | 0                  | 0                               | 0.00%              | 0                         | -              | 0                      | -               | -                   | -                               | -                  |
